# Supplementary material for: In vitro and in vivo study of epigallocatechin-3-gallate-induced apoptosis in aerobic glycolytic hepatocellular carcinoma cells involving inhibition of phosphofructokinase activity
Source: PubMed Central journal article supplement (PMC4923908; doi:10.1038/srep28479), 2016-06-28
Supplement: srep28479-s1.pdf [file srep28479-s1.pdf]

Supplementary information

***In vitro* and *in vivo* study of epigallocatechin-3-gallate-induced apoptosis in aerobic glycolytic hepatocellular carcinoma cells involving inhibition of phosphofructokinase activity**

Sainan Li<sup>1</sup>, Liwei Wu<sup>1</sup>, Jiao Feng<sup>1</sup>, Jingjing Li<sup>1</sup>, Tong Liu<sup>1</sup>, Rong Zhang<sup>1,2</sup>, Shizan Xu<sup>1,2</sup>, Keran Cheng<sup>1,3</sup>, Yuqing Zhou<sup>1,3</sup>, Shunfeng Zhou<sup>1,3</sup>, Rui Kong<sup>1,3</sup>, Kan Chen<sup>1</sup>, Fan Wang<sup>1</sup>, Yujing Xia<sup>1</sup>, Jie Lu<sup>1</sup>, Yingqun Zhou<sup>1</sup>, Weiqi Dai<sup>1</sup>, Chuanyong Guo<sup>1</sup>

<sup>1</sup>Department of Gastroenterology, Shanghai Tenth People's Hospital, Tongji University School of Medicine, Shanghai 200072, China. <sup>2</sup>The Shanghai Tenth Hospital School of Clinical Medicine of Nanjing Medical University, Shanghai 200072, China. <sup>3</sup>The School of Medicine of Soochow University, Suzhou 215006, China.

Corresponding authors: Weiqi Dai and Chuanyong Guo. Tel: +86-21-66302535. Fax: +86-21-66303983

Email: [dai\\_yue@163.com](mailto:dai_yue@163.com); [guochuanyong@hotmail.com](mailto:guochuanyong@hotmail.com)

A

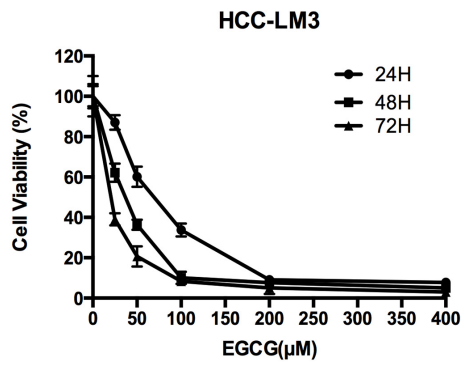

B

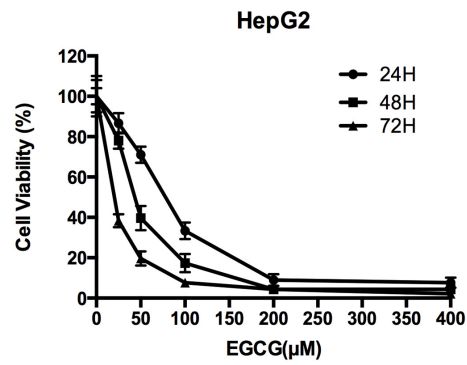

**Supplementary Figure S1: Effects of EGCG on HCC cell proliferation inhibition.**

(A and B) HCC cells were cultured with or without EGCG (25, 50, 100, 200 and 400  $\mu$ M) for 24, 48 and 72 h, and cell viability was examined using the CCK-8 method. Plotted values represent the mean  $\pm$  standard error of three independent experiments (n = 3).
